# Supplementary material for: Machine Learning Prediction of Hypoglycemia and Hyperglycemia From Electronic Health Records: Algorithm Development and Validation
Source: PubMed Central journal article supplement (PMC9345028; doi:10.2196/36176), 2022-07-18
Supplement: formative_v6i7e36176_app1.pdf [file formative_v6i7e36176_app1.pdf]

## Multimedia Appendix 1

Witte *et al.*, 2022: JMIR Form Res 2022;6(6):e36176 (doi: 10.2196/36176; PMID: 35526139)

### **Multimedia Appendix 1:** Descriptive statistics of laboratory measurements used in this study.

| <b>Laboratory measurements</b>             |               |              |            |            |                               |
|--------------------------------------------|---------------|--------------|------------|------------|-------------------------------|
| <b>Analysis (unit)</b>                     | <b>Median</b> | <b>IQR</b>   | <b>Min</b> | <b>Max</b> | <b>number of measurements</b> |
| ALAT (U/L)                                 | 32            | 19 - 68      | 0          | 13526      | 102,745                       |
| alk. phosphatase (U/L)                     | 100           | 68 - 174     | 7          | 6440       | 63,575                        |
| anorg. phosphate (mmol/L)                  | 1.03          | 0.82 - 1.28  | 0.05       | 6.36       | 117,253                       |
| ASAT (U/L)                                 | 33            | 21 - 69      | 0          | 53100      | 84,288                        |
| base excess BE (mmol/L)                    | 0.4           | -2.7 - 3.4   | -29.9      | 29.7       | 197,200                       |
| basophiles (10 <sup>9</sup> /L)            | 0.02          | 0.01 - 0.05  | 0          | 4.2        | 57,991                        |
| bicarbonate act. (mmol/L)                  | 24.2          | 21.3 - 27.2  | 1.1        | 65.6       | 197,712                       |
| bilirubin direct (µmol/L)                  | 8             | 4 - 31       | 0          | 1395       | 11,363                        |
| bilirubin total (µmol/L)                   | 10            | 6 - 24       | 0          | 1424       | 63,609                        |
| body temperature (°C)                      | 37            | 36.6 - 37.3  | 32         | 41.7       | 241,692                       |
| CA ion. at current pH (mmol/L)             | 1.17          | 1.12 - 1.22  | 0.11       | 6.13       | 206,924                       |
| CA ionized (pH 7.4) (mmol/L)               | 1.18          | 1.13 - 1.23  | 0.55       | 3.38       | 16,810                        |
| calcium total (mmol/L)                     | 2.19          | 2.06 - 2.31  | 0.67       | 5.42       | 88,103                        |
| chloride (mmol/L)                          | 107           | 104 - 110    | 65         | 138        | 212,535                       |
| C-reactive protein (mg/L)                  | 45            | 11 - 109     | 0          | 747        | 234,293                       |
| creatinine (P) (µmol/L)                    | 89            | 65 - 137     | 2          | 2063       | 269,901                       |
| creatinine ABL (µmol/L)                    | 88            | 67 - 127     | 11         | 1498       | 18,071                        |
| eGFR by CKD-EPI (mL/min)                   | 70            | 41 - 95      | 2          | 462        | 268,694                       |
| eosinophils (10 <sup>9</sup> /L)           | 0.08          | 0.01 - 0.21  | 0          | 44.3       | 58,000                        |
| erythrocytes (10 <sup>12</sup> /L)         | 3.33          | 2.88 - 3.96  | 0          | 9.43       | 353,108                       |
| Ferritin ECLIA (µg/L)                      | 274           | 95 - 770     | 4          | 587880     | 6,587                         |
| g-glutamyltransferase (U/L)                | 95            | 38 - 249     | 3          | 5360       | 72,879                        |
| glucose (mmol/L)                           | 8             | 6.39 - 10.3  | 0          | 152        | 986,700                       |
| hematocrit (L/L)                           | 0.3           | 0.26 - 0.35  | 0          | 0.9        | 352,845                       |
| hemoglobin (g/L)                           | 98            | 86 - 117     | 0          | 286        | 352,788                       |
| HbA1c (DCCT/NGSP) (%)                      | 6.6           | 5.9 - 7.6    | 3.4        | 21.3       | 13,613                        |
| HbA1c (IFCC) (mmol/mol)                    | 49            | 41 - 60      | 14         | 209        | 13,610                        |
| immature granulocytes (10 <sup>9</sup> /L) | 0.07          | 0.03 - 0.17  | 0          | 25.49      | 26,974                        |
| iron (µmol/L)                              | 8.6           | 5.4 - 13.5   | 1          | 148.8      | 3,884                         |
| leucocytes (10 <sup>9</sup> /L)            | 8.9           | 6.4 - 12.2   | 0          | 597.4      | 353,124                       |
| lymphocytes (10 <sup>9</sup> /L)           | 1.08          | 0.63 - 1.67  | 0          | 573.5      | 58,609                        |
| MCH (pg)                                   | 30            | 28 - 31      | 13         | 49         | 352,592                       |
| MCHC (g/L)                                 | 337           | 327 - 346    | 235        | 505        | 352,922                       |
| MCV (fL)                                   | 88            | 85 - 92      | 49         | 140        | 352,859                       |
| monocytes (10 <sup>9</sup> /L)             | 0.64          | 0.39 - 0.94  | 0          | 150.1      | 58,011                        |
| MPV (fL)                                   | 10.3          | 9.6 - 11     | 6.5        | 18.3       | 206,962                       |
| MPV (avg. thrombocyte-volume) (fL)         | 9.4           | 8.3 - 10.5   | 1.4        | 26.1       | 139,902                       |
| neutrophils (10 <sup>9</sup> /L)           | 6.76          | 4.15 - 10.37 | 0          | 95.74      | 58,742                        |
| normoblasts (/100 leucocytes)              | 1             | 0.5 - 3.5    | 0          | 100        | 3,266                         |
| normoblasts automated (/100 leuc.)         | 0             | 0 - 0.1      | 0          | 100        | 180,883                       |
| osmolality (mosm/kg)                       | 291           | 279 - 303    | 210        | 429        | 10,212                        |
| pCO2 (mm Hg)                               | 39            | 34 - 44      | 4          | 221        | 244,209                       |
| PCT hs (µg/L)                              | 0.44          | 0.16 - 1.97  | 0.04       | 186.1      | 2,011                         |

| <b>Analysis (unit)</b>              | <b>Median</b> | <b>IQR</b>    | <b>Min</b> | <b>Max</b> | <b>number of measurements</b> |
|-------------------------------------|---------------|---------------|------------|------------|-------------------------------|
| pH                                  | 7.411         | 7.359 - 7.454 | 6.8        | 7.798      | 249,795                       |
| pO2 (mm Hg)                         | 77            | 54 - 101      | 1          | 595        | 242,142                       |
| potassium (mmol/L)                  | 4.1           | 3.8 - 4.5     | 1.3        | 9          | 498,870                       |
| RDW (%)                             | 14.7          | 13.5 - 16.4   | 10.6       | 43.5       | 210,406                       |
| RDW (erythrocyte-size variance) (%) | 15.2          | 13.9 - 16.9   | 10.3       | 36.4       | 142,130                       |
| round epithelial cells (/μL)        | 3             | 1 - 8.1       | 0          | 924.6      | 13,085                        |
| sodium (mmol/L)                     | 139           | 136 - 142     | 97         | 177        | 483,414                       |
| thrombocytes (10 <sup>9</sup> /L)   | 208           | 133 - 294     | 0          | 4380       | 353,115                       |
| transferrin (g/L)                   | 1.78          | 1.39 - 2.23   | 0.27       | 4.73       | 3,285                         |
