# Supplementary material for: Machine Learning Prediction of Hypoglycemia and Hyperglycemia From Electronic Health Records: Algorithm Development and Validation
Source: PubMed Central journal article supplement (PMC9345028; doi:10.2196/36176), 2022-07-18
Supplement: formative_v6i7e36176_app2.pdf [file formative_v6i7e36176_app2.pdf]

## Multimedia Appendix 2

Witte *et al.*, 2022: JMIR Form Res 2022;6(6):e36176 (doi: 10.2196/36176; PMID: 35526139)

### **Multimedia Appendix 2:** List of variables used for model setup.

| Variable                                                                                                                        | Type (values)                                                                         | Rationale for variable use                                                                                                |
|---------------------------------------------------------------------------------------------------------------------------------|---------------------------------------------------------------------------------------|---------------------------------------------------------------------------------------------------------------------------|
| <b>Patient information</b>                                                                                                      |                                                                                       |                                                                                                                           |
| age                                                                                                                             | integer                                                                               | patient attributes may influence the susceptibility for decompensation                                                    |
| weight                                                                                                                          | numeric                                                                               |                                                                                                                           |
| height                                                                                                                          | numeric                                                                               |                                                                                                                           |
| administrative sex                                                                                                              | factor (m, f)                                                                         | language barrier may influence treatment in hospital                                                                      |
| language                                                                                                                        | factor                                                                                |                                                                                                                           |
| civil status                                                                                                                    | factor                                                                                | civil status may have an influence on lifestyle, nutrition etc. and thus indirectly the susceptibility for decompensation |
| stay in intensive care unit                                                                                                     | binary (0 = no, 1 = yes)                                                              | measure for overall severity of case (with dysglycemia as frequent consequence of severe disease)                         |
| <b>Diagnosis history</b>                                                                                                        |                                                                                       |                                                                                                                           |
| diagnosis information for twenty ICD-10-codes listed in the inclusion criteria (E10, E11, ..., R81), one variable per code      | binary (0 = not diagnosed previously, 1 = diagnosed previously)                       | diagnoses of diabetes and / or comorbidities may increase risk of decompensation                                          |
| sum of all diabetes(-related) diagnoses in the patient's past (variable increase of 1 per positive diagnosis)                   | integer (e.g. diagnoses of E11, E66 and K85 => feature value of 3)                    |                                                                                                                           |
| binary indicator variable for one or more of the ICD-10-codes listed in the inclusion criteria in the patient's past            | binary (0 if no diagnoses, 1 otherwise, e.g. E11, E66 and K85 => feature value of 1)) |                                                                                                                           |
| binary indicator for one or more of the main ICD-10-codes for diabetes (E10 through E16) in the patient's past                  | binary (0 = no, 1 = yes, e.g. E10 => 1, E11 and E14 => 1))                            |                                                                                                                           |
| decompensation during previous hospitalizations                                                                                 | binary (0 = no, 1 = yes)                                                              |                                                                                                                           |
| number of previous hospitalizations of patient                                                                                  | integer                                                                               | knowledge about previous decompensation may reduce risk<br>measure for severity of case                                   |
| <b>Medication (antidiabetic drugs ADD)</b>                                                                                      |                                                                                       |                                                                                                                           |
| History of anti-diabetic drug (ADD) prescription Have ADDS been administered in the past (before the current case)?             | binary (0 = no, 1 = yes)                                                              | Patients know to have received ADDs may be more or less susceptible to decompensation                                     |
| Anti-diabetic drug (ADD) administration within current case, time window before (!) decompensation event (or patient discharge) | binary (0 = no, 1 = yes)                                                              | potential measure for severity of case or risk of decompensation                                                          |
| <b>Laboratory information</b>                                                                                                   |                                                                                       |                                                                                                                           |
| total number of laboratory analyses carried out during stay                                                                     | integer                                                                               | indirect measure for severity of case                                                                                     |
| total number of laboratory analyses carried out during stay, normalized to length of stay or time until decompensation          | integer                                                                               | indirect measure for severity of case                                                                                     |
| number of extreme measurements flagged as unlikely (by outlier detection)                                                       | integer                                                                               | indirect measure for severity of case                                                                                     |
| time of last measurement before decompensation or discharge in hours                                                            | integer                                                                               | The longer a patient may remain non-decompensated the less likely it may become to happen in the clinical context         |

|                                                                                                                                           |                          |                                                                                                                            |
|-------------------------------------------------------------------------------------------------------------------------------------------|--------------------------|----------------------------------------------------------------------------------------------------------------------------|
| decompensation of opposite type has happened before within case                                                                           | binary (0 = no, 1 = yes) | If a patient has suffered from hyperglycemia within the case, he might be more susceptible for hypoglycemia and vice versa |
| <b>Features extracted from laboratory analysis history of current case (before decompensation or patient discharge, for each analyte)</b> |                          |                                                                                                                            |
| mean                                                                                                                                      | numeric                  | average measure of analyte value (intentionally, the mean is favored over the median as it is less robust to outliers)     |
| standard deviation                                                                                                                        | numeric                  | measure of fluctuation of values                                                                                           |
| analysis count                                                                                                                            | integer                  | measure for severity of case and importance of analyte                                                                     |
| interquartile range (IQR)                                                                                                                 | numeric                  | robust measure of fluctuation of values                                                                                    |
| value of last measurement (before decompensation or final measurement)                                                                    | numeric                  | “current” status                                                                                                           |
| value deviating most from analysis median of whole patient population                                                                     | numeric                  | most extreme value of analyte within case                                                                                  |
| data range (difference of minimum and maximum)                                                                                            | numeric                  | measure for range of values                                                                                                |
| data trend between second-last and last measurement before decompensation or patient discharge                                            | numeric                  | trend of values (up / down, strong increase/decrease or rather constant)                                                   |
